# Supplementary material
Source: Springer Nature journal article supplement (https://www.springermedizin.de/resource/supplementary/12943_2013_1201_MOESM9_ESM.pdf/9552360)

**A**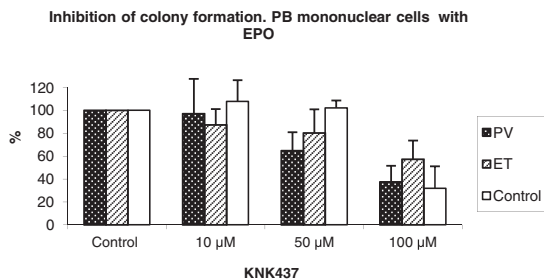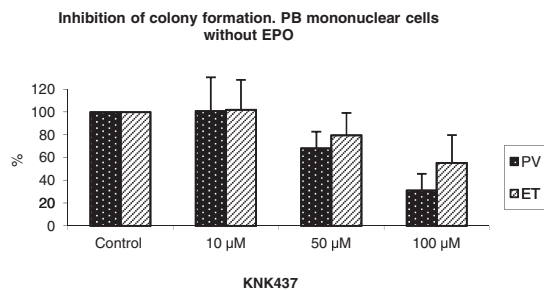**B**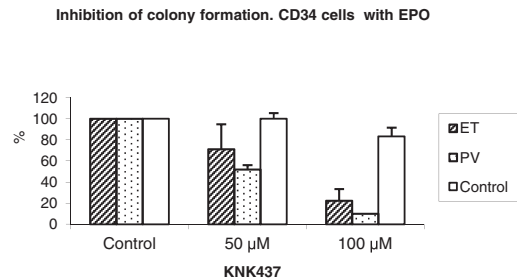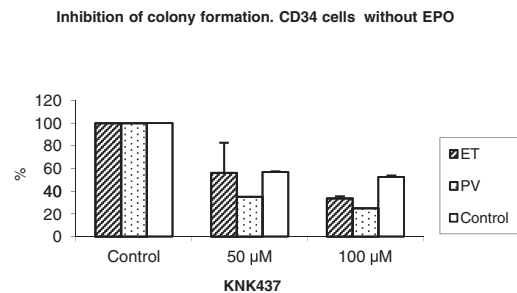**C**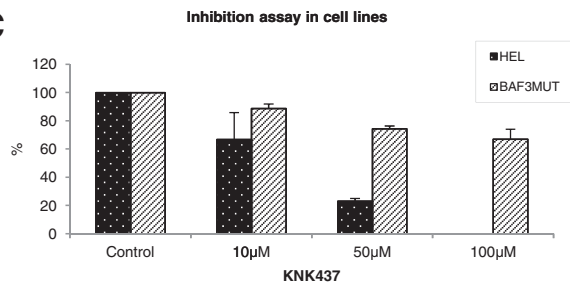**D**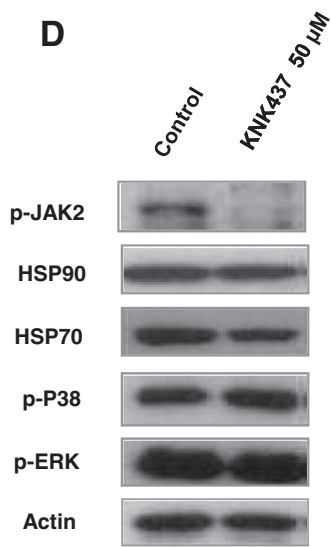**E**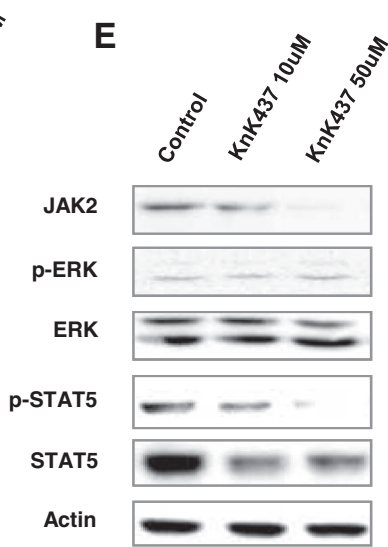**F**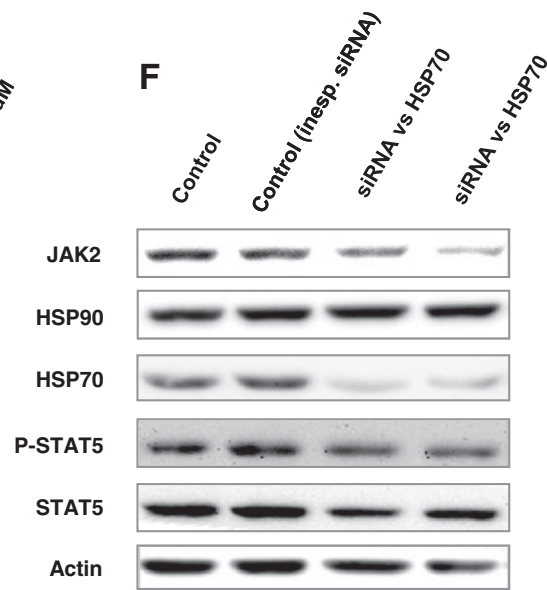

Supplement: MOESM9 [file 9552360]
